# Supplementary material
Source: publisher figshare collection journal article supplement (https://acs.figshare.com/ndownloader/files/5837112)
Supplement: Supplementary file 1 [file 5837112]

## A General Method for the Enantioselective Synthesis of Pantolactone Derivatives

David A. Evans\*, Jimmy Wu, Craig E. Masse, and David W. C. MacMillan

*Department of Chemistry & Chemical Biology, Harvard University, Cambridge, Massachusetts 02138*

### Supporting Information

**General Information.** All reactions were carried out under an atmosphere of argon or nitrogen in oven-dried glassware with magnetic stirring. THF and  $\text{CH}_2\text{Cl}_2$  were purified by passage through a bed of activated alumina.<sup>1</sup> Solvents and reagents were purified prior to use following the guidelines of Perrin and Armarego.<sup>2</sup>  $\text{ScCl}_3(\text{thf})_3$  was prepared according to literature procedure.<sup>3</sup>  $\text{AgSbF}_6$  was purchased from the Cerac Chemical Co., stored in an inert atmosphere dry box and used without further purification.  $\text{Me}_4\text{NHB}(\text{OAc})_3$  was prepared according to literature procedure.<sup>4</sup>  $\text{Et}_2\text{BOMe}$  was purchased from Aldrich Chemical Co. and used as is after distillation. Purification of reaction products was carried out by flash chromatography using EM Reagent silica gel 60 (230-400 mesh). Analytical thin layer chromatography was performed on EM Reagent 0.25 mm silica gel 60-F plates. Visualization was accomplished with UV light and ceric ammonium nitrate stain followed by heating. Optical rotations were measured on a Jasco DIP-0181 digital polarimeter with a sodium lamp and are reported as follows:  $[\alpha]_D^{25}$  (c g/100 mL, solvent). Infrared spectra were recorded on a Perkin Elmer 1600 series FT-IR spectrometer.  $^1\text{H}$  NMR spectra were recorded on a Varian Inova-500 (500 MHz) or Varian Mercury-400 (400 MHz) spectrometer and are reported in ppm using solvent as an internal standard ( $\text{CDCl}_3$  at 7.26 ppm). Data reported as (s=singlet, d=doublet, t=triplet, q=quartet, m=multiplet, b=broad; integration; coupling constant(s) in Hz). Proton-decoupled  $^{13}\text{C}$  NMR spectra were recorded on Varian Inova-500 (125 MHz) or Varian Mercury-400 (100 MHz) spectrometer and are reported in ppm using solvent as an internal standard ( $\text{CDCl}_3$  at 77.0 ppm). High resolution mass spectra were obtained on Jeol AX-505 or SX-102 spectrometers at the Harvard University Mass Spectrometry Laboratory. Analytical high performance liquid chromatography (HPLC) was performed on a Hewlett-Packard 1100 Series HPLC with a diode array detector using the indicated chiral column.

### General Procedure for the Catalyzed Reaction of Thiosilylketene Acetals with Ethyl Glyoxylate.

A dry flask was charged with  $\text{ScCl}_3(\text{thf})_3$  (0.10 equiv) and phenyl-pyridyl-bis(oxazoliny) ligand (0.11 equiv) in an inert atmosphere ( $\text{N}_2$ ) glove box. In a separate flask, also in an inert atmosphere ( $\text{N}_2$ ) glove box, was charged  $\text{AgSbF}_6$  (0.9 equiv). Both flasks were brought out of the glove box and the flask containing the metal/ligand was charged with  $\text{CH}_2\text{Cl}_2$  (2 mL) and stirred at rt for 30 minutes. The resulting solution was transferred to the flask containing  $\text{AgSbF}_6$  via syringe and the mixture stirred for 30 minutes followed by cooling to  $-78^\circ\text{C}$ . Ethyl glyoxylate (1.5 equiv) and thiosilylketene acetal (1.0 equiv) were added sequentially and stirred for 3 h at  $-78^\circ\text{C}$ . After the reaction was complete, the mixture was filtered through silica with  $\text{Et}_2\text{O}$  and the silyl ether was hydrolyzed with 1N HCl in EtOAc (30 min,  $25^\circ\text{C}$ ) to give the hydroxy ester which was purified by flash chromatography.<sup>5</sup>

**General Procedure for the Catalyzed Reaction of Enolsilanes with Ethyl Glyoxylate.** A dry flask was charged with  $\text{ScCl}_3(\text{thf})_3$  (0.15 equiv) and *t*-Bu-pyridyl-bis(oxazoliny) ligand (0.17 equiv) in an

inert atmosphere (N<sub>2</sub>) glove box. In a separate flask, also in an inert atmosphere (N<sub>2</sub>) glove box, was charged AgSbF<sub>6</sub> (0.14 equiv). Both flasks were brought out of the glove box and the flask containing the metal/ligand was charged with CH<sub>2</sub>Cl<sub>2</sub> (1 mL) and stirred at rt for 1 h. The resulting solution was transferred to the flask containing AgSbF<sub>6</sub> via syringe and the mixture stirred for 30 minutes followed by cooling to -78 °C. Ethyl glyoxylate (1.5 equiv), enolsilane (1.0 equiv), and TMS-Cl (2 equiv) were added sequentially and the reaction stirred for 16 h at -35 °C. After the reaction was complete, the mixture was filtered through silica with Et<sub>2</sub>O and the silyl ether was hydrolyzed with 1N HCl in EtOAc (30 min, 25 °C) to give the hydroxy ester which was purified by flash chromatography.<sup>5</sup>

**General Procedure (A): Raney Nickel Reduction/Cyclization of Thioesters to Pantolactones.** To a round bottom flask containing a magnetic stirring bar, was added isopropanol (1.0 mL) and Raney Ni (1.0 mL of a slurry in H<sub>2</sub>O, 0.5 g catalyst/mL of settled material). This mixture was purged with hydrogen from a balloon under vigorous stirring. To this suspension of Raney Ni, was added a solution of the aldol adduct (1.0 equiv) in Et<sub>2</sub>O (0.52 mL, 0.25 M). The reaction mixture was stirred vigorously until the aldol adduct was completely consumed (15-30 min), as determined by TLC (30% EtOAc/hexanes). The reaction mixture was then filtered through a pad of Celite and washed repeatedly with EtOH (3 x 25 mL). The filtrate was concentrated *in vacuo* to provide the unpurified lactone. Purification by flash chromatography (30–40% EtOAc/hexanes) provided the title compounds.

**General Procedure (B): Syn Reduction/Cyclization of Hydroxy-Esters to Pantolactones.** To an oven dried flask was added Me<sub>4</sub>NHB(OAc)<sub>3</sub> (8.4 equiv) and MeCN/AcOH (1:1 v/v) to afford a 0.9 M solution which was stirred for 30 min at rt before cooling to -20 °C. To this mixture, was added a solution of hydroxy-ester (1.0 equiv) in MeCN (0.65 M) and aged for 1 hr at -20 °C before warming to 0 °C and aging for an additional 16 hr. To the reaction was added sat. Rochelle's salt and sat. NaHCO<sub>3</sub> and then extracted with CH<sub>2</sub>Cl<sub>2</sub> (4 x 10 mL). The organic layers were combined and washed with NaHCO<sub>3</sub> (10 mL). The aqueous layer was back-extracted with CH<sub>2</sub>Cl<sub>2</sub> (4 x 10 mL). The organic layers were combined and concentrated *in vacuo* to afford a colorless oil which was transferred to a dry flask and charged with benzene (0.23 mL), 3 Å MS (25 mg), and *p*-TSA (0.5 equiv). The reaction was stirred at rt for 30 min. and diluted with Et<sub>2</sub>O (2 mL). Triethylamine (6 drops) was added to the mixture which was then filtered through a plug of silica gel and flushed with Et<sub>2</sub>O (50 mL). Concentration of the solvent *in vacuo* provided the desired product analytically pure.

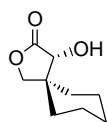

**(R)-4-Hydroxy-2-oxa-spiro[4.5]decan-3-one (Table 2, entry 1).** The title compound was prepared according to General Procedure A and isolated as a colorless oil (89 % yield): [  $\alpha$  ]<sub>D</sub><sup>25</sup> +16.3 ° (*c* 0.5, CHCl<sub>3</sub>); IR (film) 3442, 2938, 2860, 1762, 1559, 1473, 1164, 1103, 990 cm<sup>-1</sup>; <sup>1</sup>H NMR (400 MHz, CHCl<sub>3</sub>) 4.33 (d, 1H, *J*=9.2 Hz), 4.10 (d, 1H, *J*=4.3 Hz), 3.87 (dd, 1H, *J*=1.4, 9.2 Hz), 3.49 (d, 1H, *J*=4.4 Hz), 1.77-1.54 (m, 6H), 1.44-1.35 (m, 2H), 1.26-1.16 (m, 2H); <sup>13</sup>C NMR (100 MHz, CHCl<sub>3</sub>) 178.0, 75.6, 73.7, 44.0, 33.6, 25.8, 25.3, 22.9, 21.8; HRMS (CI, NH<sub>3</sub>): Exact mass calcd for C<sub>8</sub>H<sub>12</sub>O<sub>3</sub> [M + NH<sub>4</sub>]<sup>+</sup>, 188.1287. Found 188.1283.

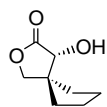

**(R)-4-Hydroxy-2-oxa-spiro[4.4]nonan-3-one (Table 2, entry 2).** The title compound was prepared according to General Procedure A and isolated as a colorless oil (94 % yield): [  $\alpha$  ]<sub>D</sub><sup>25</sup> +19.3 ° (*c* 1.5, CHCl<sub>3</sub>); IR (film) 3390, 2952, 2869, 1768, 1318, 1289, 1201, 1146, 1100, 992 cm<sup>-1</sup>; <sup>1</sup>H NMR (400 MHz, CHCl<sub>3</sub>) 4.33 (d, 1H, *J*=3.9 Hz), 4.12 (d, 1H, *J*=8.8 Hz), 4.00 (dd,

1H,  $J=0.9$ , 8.8 Hz), 3.38 (br, 1H), 2.03-1.96 (m, 1H), 1.93-1.86 (m, 1H), 1.80-1.58 (m, 5H), 1.44-1.38 (m, 1H);  $^{13}\text{C}$  NMR (100 MHz,  $\text{CHCl}_3$ ) 177.8, 76.0, 73.6, 51.6, 33.5, 29.1, 25.0, 24.9; HRMS (CI,  $\text{NH}_3$ ): Exact mass calcd for  $\text{C}_8\text{H}_{12}\text{O}_3$   $[\text{M} + \text{NH}_4]^+$ , 174.1130. Found 174.1125.

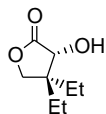

**(R)-4,4-Diethyl-3-hydroxy-dihydro-furan-2-one (Table 2, entry 3).** The title compound was prepared according to the General Procedure A to provide the pure product as a light yellow oil (95% yield) after flash chromatography 40% EtOAc/hexanes:  $[\alpha]_{\text{D}}^{25} -12.0^\circ$  ( $c$  0.33, MeOH); IR (neat) 3423, 2976, 1754, 1637, 1461  $\text{cm}^{-1}$ ;  $^1\text{H}$  NMR (500 MHz,  $\text{CDCl}_3$ )

4.21 (br d, 1H,  $J = 2.8$  Hz), 4.16 (d, 1H,  $J = 8.8$  Hz), 3.87 (d, 1H,  $J = 9.2$  Hz), 2.55 (br d, 1H,  $J = 2.4$  Hz), 1.65-1.42 (m, 4H), 0.98 (t, 3H,  $J = 8.0$  Hz), 0.90 (t, 3H,  $J = 7.6$  Hz);  $^{13}\text{C}$  NMR (125 MHz,  $\text{CDCl}_3$ )

178.2, 74.8, 73.1, 46.7, 28.1, 21.4, 8.49, 8.05; HRMS (CI/ $\text{NH}_3$ ) exact mass calcd for  $\text{C}_8\text{H}_{15}\text{O}_3$   $[\text{M}+\text{H}]^+$ , 159.1021. Found 159.1019. Assay of enantiomeric excess: GC analysis ( -Cyclodextrin, 60  $^\circ\text{C}$ , 3  $^\circ\text{C}/\text{min}$  at 25 psi;  $t_{\text{r}}$  (major)= 24.38,  $t_{\text{r}}$  (minor) = 24.0), 95 % ee.

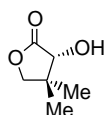

**(R)-3-Hydroxy-4,4-dimethyl-dihydro-furan-2-one (Table 2, entry 4).** The title compound was prepared according General Procedure A to provide the pure product as a light yellow oil (95% yield) after flash chromatography with 30% EtOAc/hexanes:  $[\alpha]_{\text{D}}^{25} -54.0^\circ$  ( $c$  0.25,  $\text{H}_2\text{O}$ ); IR (neat) 3442, 2092, 1758, 1638, 1124  $\text{cm}^{-1}$ ;  $^1\text{H}$  NMR (500 MHz,  $\text{CDCl}_3$ ) 4.11 (br s, 1H), 4.03

(d, 1H,  $J = 9.0$  Hz), 3.94 (d, 1H,  $J = 8.5$  Hz), 1.24 (s, 3H), 1.08 (s, 3H);  $^{13}\text{C}$  NMR (125 MHz,  $\text{CDCl}_3$ ) 177.4, 76.3, 75.7, 40.9, 22.9, 18.8; HRMS (CI/ $\text{NH}_3$ ) exact mass calcd for  $\text{C}_6\text{H}_{11}\text{O}_3$   $[\text{M}+\text{H}]^+$ , 131.0708.

Found 131.0710. Assay of enantiomeric excess: GC analysis ( -Cyclodextrin, 60  $^\circ\text{C}$ , 3  $^\circ\text{C}/\text{min}$  at 25 psi,  $t_{\text{r}}$  (major)= 16.77,  $t_{\text{r}}$  (minor) = 17.29), 94% ee.

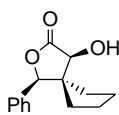

**(S,S)-4-Hydroxy-1-phenyl-2-oxa-spiro[4.4]nonan-3-one (Table 2, entry 5).** The title compound was prepared according to General Procedure B and isolated as an amorphous white solid (80 % yield). X-ray quality crystals were obtained by recrystallization in hot EtOAc/hexanes:  $[\alpha]_{\text{D}}^{25} -14.5^\circ$  ( $c$  0.195,  $\text{CHCl}_3$ ); IR ( $\text{CHCl}_3$ ) 3566, 3108, 2960, 2875, 2359,

1784, 1456  $\text{cm}^{-1}$ ;  $^1\text{H}$  NMR (400 MHz,  $\text{CHCl}_3$ ) 7.42-7.26 (m, 5H), 5.31 (s, 1H), 4.51 (d, 1H,  $J=3.0$  Hz), 2.81 (d, 1H,  $J=3.2$  Hz), 2.04-1.89 (m, 2H), 1.71-1.49 (m, 3H), 1.43-1.34 (m, 1H), 1.27-1.20 (m, 1H), 1.01-0.93 (m, 1H);  $^{13}\text{C}$  NMR (100 MHz,  $\text{CHCl}_3$ ) 176.9, 134.5, 128.8, 128.6, 126.7, 84.9, 57.2, 34.1, 25.7, 25.0, 24.6; HRMS (EI): Exact mass calcd for  $\text{C}_{14}\text{H}_{16}\text{O}_3$   $[\text{M}]^+$ , 232.1100. Found 232.1097. Assay of enantiomeric excess: HPLC analysis (Chiracel AD, 10 %  $i\text{PrOH}$ /hexanes, 0.7 mL/min, 215 nm;  $t_{\text{r}}$  (major) = 16.3,  $t_{\text{r}}$  (minor) = 18.3), 99 % ee.

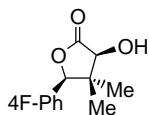

**(S,S)-3-Hydroxy-4,4-dimethyl-5-(4-fluorophenyl)-dihydro-furan-2-one (Table 2, entry 6).** The title compound was prepared according to General Procedure B and isolated as a colorless oil (71 % yield):  $[\alpha]_{\text{D}}^{25} -53.0^\circ$  ( $c$  0.54,  $\text{CHCl}_3$ ); IR ( $\text{CHCl}_3$ ) 3564,

3449, 2970, 2917, 1775, 1611, 1514  $\text{cm}^{-1}$ ;  $^1\text{H}$  NMR (400 MHz,  $\text{CHCl}_3$ ) 7.26 (t, 2H,  $J=8.8$  Hz), 7.09 (t, 2H,  $J=8.8$  Hz), 5.09 (s, 1H), 4.34 (s, 1H), 1.27 (s, 3H), 0.62 (s, 3H);  $^{13}\text{C}$  NMR (100 MHz,  $\text{CHCl}_3$ ) 176.8, 163.0 (d,  $J=248$  Hz), 129.7, 128.0 (d,  $J=7.6$  Hz), 115.6 (d,  $J=22.1$  Hz), 88.5, 46.5, 22.6, 14.8; HRMS (EI): Exact mass calcd for  $\text{C}_{12}\text{H}_{13}\text{O}_3\text{F}$   $[\text{M}]^+$ , 224.0849. Found 224.0844.

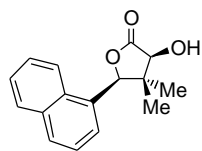

**(S,S)-3-Hydroxy-4,4-dimethyl-5-naphthalen-1-yl-dihydro-furan-2-one (Table 2, entry 7).** The title compound was prepared according to General Procedure B and isolated as an amorphous pale yellow solid (75 % yield):  $[\alpha]_D^{25} -131.0^\circ$  ( $c$  0.61,  $\text{CHCl}_3$ ); IR ( $\text{CHCl}_3$ ) 3562, 3013, 2971, 1780, 1466, 1121  $\text{cm}^{-1}$ ;  $^1\text{H}$  NMR (400 MHz,  $\text{CHCl}_3$ ) 7.97-7.87 (m, 3H), 7.61 (d, 1H,  $J=6.6$  Hz), 7.56-7.51 (m, 3H), 6.10 (s, 1H), 4.53 (s, 1H), 1.37 (s, 3H), 0.71 (s, 3H);  $^{13}\text{C}$  NMR (100 MHz,  $\text{CHCl}_3$ ) 177.1, 133.9, 131.0, 129.7, 129.4, 129.3, 126.6, 125.9, 125.7, 125.3, 123.1, 82.2, 77.9, 47.6, 24.2, 15.7; HRMS (EI): Exact mass calcd for  $\text{C}_{16}\text{H}_{16}\text{O}_3$   $[\text{M}]^+$ , 256.1099. Found 256.1100.

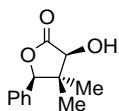

**(S,S)-3-Hydroxy-4,4-dimethyl-5-phenyl-dihydro-furan-2-one (Table 2, entry 8).** The title compound was prepared according to General Procedure B and isolated as an amorphous white solid (70 % yield):  $[\alpha]_D^{25} -45.1^\circ$  ( $c$  0.41,  $\text{CHCl}_3$ ); IR ( $\text{CHCl}_3$ ) 3567, 3450, 3013, 2970, 2934, 2361, 1785, 1774  $\text{cm}^{-1}$ ;  $^1\text{H}$  NMR (400 MHz,  $\text{CHCl}_3$ ) 7.42-7.36 (m, 3H), 7.29-7.26 (m, 2H), 5.11 (s, 1H), 4.35 (s, 1H), 2.90 (br, 1H), 1.29 (s, 3H), 0.63 (s, 3H);  $^{13}\text{C}$  NMR (100 MHz,  $\text{CHCl}_3$ ) 177.0, 133.9, 128.8, 128.6, 126.2, 86.0, 77.5, 46.5, 22.7, 14.9; HRMS (EI): Exact mass calcd for  $\text{C}_{12}\text{H}_{14}\text{O}_3$   $[\text{M}]^+$ , 206.0943. Found 206.0939.

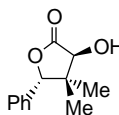

**(S,R)-3-Hydroxy-4,4-dimethyl-5-phenyl-dihydro-furan-2-one (Table 2, entry 9).** To a dry flask was charged 2-Hydroxy-3,3-dimethyl-4-oxo-4-phenyl-butyric acid ethyl ester (24.2 mg, 0.097 mmol),  $\text{Et}_2\text{BOMe}$  (12.6  $\mu\text{L}$ , 0.13 mmol), and THF/MeOH (4:1 v/v, 0.7 mL) and aged at RT for 1 h. After cooling to  $-78^\circ\text{C}$ ,  $\text{NaBH}_4$  (9.0 mg, 0.24 mmol) was added and the reaction was aged at  $-78^\circ\text{C}$  for 21 h. To the reaction was added AcOH (1 mL). After aging at rt for 1 h, the mixture was azeotroped *in vacuo* with MeOH (3 x 50 mL,  $50^\circ\text{C}$ ) and diluted with  $\text{Et}_2\text{O}$ . The mixture was washed with sat.  $\text{NaHCO}_3$  and then back extracted with  $\text{Et}_2\text{O}$ . The organic layers were combined, dried with  $\text{MgSO}_4$  and concentrated *in vacuo* to afford a colorless oil which was transferred to a dry flask and charged with benzene (1 mL), 3 Å MS (25 mg), and *p*-TSA (0.5 equiv). The reaction was stirred at rt for 30 minutes and diluted with  $\text{Et}_2\text{O}$  (4 mL). Triethylamine (6 drops) was added to the mixture, which was then filtered through a plug of silica gel and flushed with  $\text{Et}_2\text{O}$  (50 mL). The solvent was removed *in vacuo* and the residue chromatographed (5-15 % EtOAc/hexanes) to afford the title compound as a colorless oil (73 % yield):  $[\alpha]_D^{25} -58.5^\circ$  ( $c$  0.59,  $\text{CHCl}_3$ ); IR ( $\text{CHCl}_3$ ) 3577, 3450, 3018, 2967, 1770, 1605, 1455  $\text{cm}^{-1}$ ;  $^1\text{H}$  NMR (400 MHz,  $\text{CDCl}_3$ ) 7.40-7.32 (m, 3H), 7.18-7.15 (m, 2H), 5.28 (s, 1H), 4.21 (d, 1H,  $J=3.7$ ), 2.91 (d, 1H,  $J=3.7$ ), 1.26 (s, 3H), 0.81 (s, 3H);  $^{13}\text{C}$  NMR (100 MHz,  $\text{CHCl}_3$ ) 177.3, 135.8, 128.7, 126.0, 88.7, 75.0, 44.0, 21.9, 20.9; HRMS (EI): Exact mass calcd for  $\text{C}_{12}\text{H}_{14}\text{O}_3$   $[\text{M}]^+$ , 206.0943. Found 206.0942.

<sup>1</sup> Pangborn, A. B.; Giardello, M. A.; Grubbs, R. H.; Rosen, R. K.; Timmers, F. J. *Organometallics* **1996**, *15*, 1518-1520.

<sup>2</sup> Perrin, D. D. and Armarego, W. L. F. *Purification of Laboratory Chemicals*; 3<sup>rd</sup> ed., Pergamon Press, Oxford, 1988.

<sup>3</sup> Manzer, L. E. *Inorg. Synth.* **1982**, *21*, 139-140.

<sup>4</sup> Evans, D. A.; Chapman, K. T.; Carreira, E. M. *J. Am. Chem. Soc.* **1988**, *110*, 3560-3578.

<sup>5</sup> See preceeding article in this issue for full characterization of compounds.

### X-ray crystallographic data for entry 5, table 2.

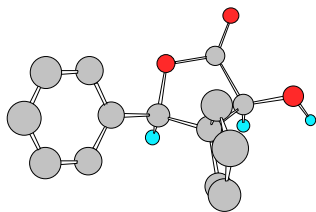

Table 1. Crystal data and structure refinement for JWU2t.

|                                   |                                                            |
|-----------------------------------|------------------------------------------------------------|
| Identification code               | jwu2t                                                      |
| Empirical formula                 | C <sub>14</sub> H <sub>16</sub> O <sub>3</sub>             |
| Formula weight                    | 232.27                                                     |
| Temperature                       | 293(2) K                                                   |
| Wavelength                        | 0.71073 Å                                                  |
| Crystal system                    | Orthorhombic                                               |
| Space group                       | P2(1)2(1)2(1)                                              |
| Unit cell dimensions              | a = 6.1337(8) Å = 90°.                                     |
|                                   | b = 7.5487(10) Å = 90°.                                    |
|                                   | c = 25.784(3) Å = 90°.                                     |
| Volume                            | 1193.9(3) Å <sup>3</sup>                                   |
| Z                                 | 4                                                          |
| Density (calculated)              | 1.292 Mg/m <sup>3</sup>                                    |
| Absorption coefficient            | 0.090 mm <sup>-1</sup>                                     |
| F(000)                            | 496                                                        |
| Crystal size                      | .8 x .8 x 6.5 mm <sup>3</sup>                              |
| Theta range for data collection   | 1.58 to 28.29°.                                            |
| Index ranges                      | -7<= <i>h</i> <=8, -10<= <i>k</i> <=9, -27<= <i>l</i> <=33 |
| Reflections collected             | 8021                                                       |
| Independent reflections           | 2880 [R(int) = 0.0967]                                     |
| Completeness to theta = 28.29°    | 99.0 %                                                     |
| Absorption correction             | None                                                       |
| Refinement method                 | Full-matrix least-squares on F <sup>2</sup>                |
| Data / restraints / parameters    | 2880 / 0 / 155                                             |
| Goodness-of-fit on F <sup>2</sup> | 1.129                                                      |
| Final R indices [I>2sigma(I)]     | R1 = 0.0802, wR2 = 0.1823                                  |

---

|                              |                                     |
|------------------------------|-------------------------------------|
| R indices (all data)         | R1 = 0.0889, wR2 = 0.1871           |
| Absolute structure parameter | -2(2)                               |
| Largest diff. peak and hole  | 0.310 and -0.309 e. Å <sup>-3</sup> |

Table 2. Atomic coordinates ( $\times 10^4$ ) and equivalent isotropic displacement parameters Å<sup>2</sup> $\times 10^3$ ) for JWU2t. U(eq) is defined as one third of the trace of the orthogonalized U<sup>ij</sup> tensor.

---

|       | x        | y        | z       | U(eq)  |
|-------|----------|----------|---------|--------|
| O(1)  | -2542(4) | 3549(3)  | 9259(1) | 36(1)  |
| C(2)  | 2588(5)  | 1400(4)  | 8140(1) | 26(1)  |
| O(3)  | 125(4)   | 3015(3)  | 8699(1) | 29(1)  |
| C(4)  | 2166(4)  | 1987(4)  | 8685(1) | 24(1)  |
| O(2)  | -453(4)  | 936(3)   | 9912(1) | 37(1)  |
| C(6)  | 3984(6)  | -229(4)  | 9328(1) | 36(1)  |
| C(7)  | 417(5)   | -1008(4) | 8948(1) | 32(1)  |
| C(8)  | 4675(5)  | 830(4)   | 8003(1) | 35(1)  |
| C(9)  | 3508(7)  | 309(5)   | 7133(1) | 43(1)  |
| C(10) | -816(5)  | 2871(4)  | 9168(1) | 27(1)  |
| C(11) | 5114(6)  | 252(5)   | 7504(2) | 42(1)  |
| C(12) | 976(5)   | 1441(4)  | 7762(1) | 30(1)  |
| C(13) | 677(5)   | 1784(4)  | 9512(1) | 26(1)  |
| C(14) | 1435(6)  | 898(5)   | 7258(1) | 38(1)  |
| C(15) | 1847(5)  | 585(4)   | 9119(1) | 23(1)  |
| C(16) | 1733(11) | -2618(6) | 9070(4) | 127(4) |
| C(17) | 3849(10) | -2165(6) | 9219(3) | 90(2)  |

---

Table 2. Bond lengths [Å] and angles [°] for JWU2t.

---

|            |          |
|------------|----------|
| O(1)-C(10) | 1.200(4) |
| C(2)-C(12) | 1.388(4) |
| C(2)-C(8)  | 1.396(5) |
| C(2)-C(4)  | 1.496(4) |
| O(3)-C(10) | 1.344(4) |
| O(3)-C(4)  | 1.473(4) |

---

|             |          |
|-------------|----------|
| C(4)-C(15)  | 1.551(4) |
| O(2)-C(13)  | 1.396(4) |
| C(6)-C(17)  | 1.490(6) |
| C(6)-C(15)  | 1.545(4) |
| C(7)-C(16)  | 1.493(6) |
| C(7)-C(15)  | 1.552(4) |
| C(8)-C(11)  | 1.385(5) |
| C(9)-C(11)  | 1.374(6) |
| C(9)-C(14)  | 1.385(5) |
| C(10)-C(13) | 1.517(4) |
| C(12)-C(14) | 1.392(5) |
| C(13)-C(15) | 1.538(4) |
| C(16)-C(17) | 1.396(8) |

|                   |          |
|-------------------|----------|
| C(12)-C(2)-C(8)   | 118.8(3) |
| C(12)-C(2)-C(4)   | 122.0(3) |
| C(8)-C(2)-C(4)    | 119.2(3) |
| C(10)-O(3)-C(4)   | 110.1(2) |
| O(3)-C(4)-C(2)    | 109.0(2) |
| O(3)-C(4)-C(15)   | 103.6(2) |
| C(2)-C(4)-C(15)   | 119.7(2) |
| C(17)-C(6)-C(15)  | 106.1(3) |
| C(16)-C(7)-C(15)  | 105.4(3) |
| C(11)-C(8)-C(2)   | 120.7(3) |
| C(11)-C(9)-C(14)  | 120.4(3) |
| O(1)-C(10)-O(3)   | 121.5(3) |
| O(1)-C(10)-C(13)  | 130.4(3) |
| O(3)-C(10)-C(13)  | 108.2(3) |
| C(9)-C(11)-C(8)   | 119.8(3) |
| C(2)-C(12)-C(14)  | 120.3(3) |
| O(2)-C(13)-C(10)  | 112.4(3) |
| O(2)-C(13)-C(15)  | 116.6(2) |
| C(10)-C(13)-C(15) | 102.3(2) |
| C(9)-C(14)-C(12)  | 119.8(3) |
| C(13)-C(15)-C(6)  | 113.6(2) |

---

|                  |          |
|------------------|----------|
| C(13)-C(15)-C(4) | 97.6(2)  |
| C(6)-C(15)-C(4)  | 114.6(2) |
| C(13)-C(15)-C(7) | 112.3(2) |
| C(6)-C(15)-C(7)  | 105.7(2) |
| C(4)-C(15)-C(7)  | 113.3(2) |
| C(17)-C(16)-C(7) | 111.2(4) |
| C(16)-C(17)-C(6) | 110.1(4) |

---

Symmetry transformations used to generate equivalent atoms:

Table 4. Anisotropic displacement parameters ( $\text{\AA}^2 \times 10^3$ ) for JWU2t. The anisotropic displacement factor exponent takes the form:  $-2^2 [h^2 a^{*2} U^{11} + \dots + 2 h k a^* b^* U^{12}]$

---

|       | $U^{11}$ | $U^{22}$ | $U^{33}$ | $U^{23}$ | $U^{13}$ | $U^{12}$ |
|-------|----------|----------|----------|----------|----------|----------|
| O(1)  | 39(1)    | 36(1)    | 33(1)    | 3(1)     | 4(1)     | 8(1)     |
| C(2)  | 31(2)    | 18(1)    | 29(2)    | 1(1)     | 4(1)     | -4(1)    |
| O(3)  | 39(1)    | 24(1)    | 23(1)    | 0(1)     | 0(1)     | 5(1)     |
| C(4)  | 25(1)    | 20(1)    | 26(1)    | -1(1)    | -1(1)    | -5(1)    |
| O(2)  | 45(1)    | 44(1)    | 21(1)    | 6(1)     | 1(1)     | 7(1)     |
| C(6)  | 34(2)    | 36(2)    | 38(2)    | 4(1)     | -8(1)    | 6(1)     |
| C(7)  | 39(2)    | 27(1)    | 30(2)    | -2(1)    | -1(1)    | -9(1)    |
| C(8)  | 35(2)    | 35(2)    | 36(2)    | -3(1)    | -1(1)    | 2(1)     |
| C(9)  | 63(2)    | 37(2)    | 28(2)    | -11(1)   | 17(2)    | -5(2)    |
| C(10) | 36(2)    | 21(1)    | 24(1)    | -2(1)    | 1(1)     | -7(1)    |
| C(11) | 37(2)    | 43(2)    | 46(2)    | -13(2)   | 12(2)    | 2(2)     |
| C(12) | 32(2)    | 30(1)    | 27(2)    | -2(1)    | 1(1)     | -1(1)    |
| C(13) | 31(2)    | 27(1)    | 21(1)    | -4(1)    | -4(1)    | 1(1)     |
| C(14) | 51(2)    | 36(2)    | 27(2)    | -4(1)    | -4(2)    | -8(2)    |
| C(15) | 30(1)    | 21(1)    | 19(1)    | -1(1)    | -3(1)    | -4(1)    |
| C(16) | 95(4)    | 25(2)    | 262(11)  | -23(4)   | -83(6)   | 1(2)     |
| C(17) | 88(4)    | 38(2)    | 145(6)   | -2(3)    | -51(4)   | 21(3)    |

---

Table 5. Hydrogen coordinates ( $\times 10^4$ ) and isotropic displacement parameters ( $\text{\AA}^2 \times 10^{-3}$ )



---

for JWU2t.

---

|        | x    | y     | z     | U(eq) |
|--------|------|-------|-------|-------|
| <hr/>  |      |       |       |       |
| H(4)   | 3359 | 2773  | 8790  | 28    |
| H(2)   | 349  | 829   | 10164 | 55    |
| H(6A)  | 5235 | 286   | 9154  | 43    |
| H(6B)  | 4119 | -19   | 9698  | 43    |
| H(7A)  | -949 | -1020 | 9137  | 38    |
| H(7B)  | 104  | -947  | 8580  | 38    |
| H(8)   | 5782 | 838   | 8250  | 42    |
| H(9)   | 3815 | -50   | 6796  | 51    |
| H(11)  | 6493 | -173  | 7420  | 50    |
| H(12)  | -417 | 1834  | 7846  | 36    |
| H(13)  | 1756 | 2581  | 9668  | 31    |
| H(14)  | 353  | 930   | 7006  | 46    |
| H(16A) | 1035 | -3272 | 9349  | 153   |
| H(16B) | 1790 | -3380 | 8768  | 153   |
| H(17A) | 4861 | -2472 | 8944  | 108   |
| H(17B) | 4253 | -2826 | 9527  | 108   |

---

Table 6. Torsion angles [°] for JWU2t.

---

|                       |           |
|-----------------------|-----------|
| C(10)-O(3)-C(4)-C(2)  | 151.9(2)  |
| C(10)-O(3)-C(4)-C(15) | 23.3(3)   |
| C(12)-C(2)-C(4)-O(3)  | -15.7(4)  |
| C(8)-C(2)-C(4)-O(3)   | 162.9(3)  |
| C(12)-C(2)-C(4)-C(15) | 103.2(3)  |
| C(8)-C(2)-C(4)-C(15)  | -78.2(4)  |
| C(12)-C(2)-C(8)-C(11) | -2.4(5)   |
| C(4)-C(2)-C(8)-C(11)  | 179.0(3)  |
| C(4)-O(3)-C(10)-O(1)  | -177.1(3) |
| C(4)-O(3)-C(10)-C(13) | 3.4(3)    |
| C(14)-C(9)-C(11)-C(8) | -1.7(6)   |

---

|                        |           |
|------------------------|-----------|
| C(2)-C(8)-C(11)-C(9)   | 2.8(5)    |
| C(8)-C(2)-C(12)-C(14)  | 0.9(4)    |
| C(4)-C(2)-C(12)-C(14)  | 179.4(3)  |
| O(1)-C(10)-C(13)-O(2)  | 25.8(4)   |
| O(3)-C(10)-C(13)-O(2)  | -154.7(2) |
| O(1)-C(10)-C(13)-C(15) | 151.7(3)  |
| O(3)-C(10)-C(13)-C(15) | -28.9(3)  |
| C(11)-C(9)-C(14)-C(12) | 0.2(6)    |
| C(2)-C(12)-C(14)-C(9)  | 0.1(5)    |
| O(2)-C(13)-C(15)-C(6)  | -76.0(3)  |
| C(10)-C(13)-C(15)-C(6) | 161.0(2)  |
| O(2)-C(13)-C(15)-C(4)  | 162.9(2)  |
| C(10)-C(13)-C(15)-C(4) | 39.9(3)   |
| O(2)-C(13)-C(15)-C(7)  | 43.8(3)   |
| C(10)-C(13)-C(15)-C(7) | -79.2(3)  |
| C(17)-C(6)-C(15)-C(13) | 129.9(4)  |
| C(17)-C(6)-C(15)-C(4)  | -119.1(4) |
| C(17)-C(6)-C(15)-C(7)  | 6.4(5)    |
| O(3)-C(4)-C(15)-C(13)  | -38.5(2)  |
| C(2)-C(4)-C(15)-C(13)  | -160.1(3) |
| O(3)-C(4)-C(15)-C(6)   | -158.9(2) |
| C(2)-C(4)-C(15)-C(6)   | 79.6(3)   |
| O(3)-C(4)-C(15)-C(7)   | 79.8(3)   |
| C(2)-C(4)-C(15)-C(7)   | -41.8(4)  |
| C(16)-C(7)-C(15)-C(13) | -123.4(5) |
| C(16)-C(7)-C(15)-C(6)  | 0.9(5)    |
| C(16)-C(7)-C(15)-C(4)  | 127.2(5)  |
| C(15)-C(7)-C(16)-C(17) | -8.6(9)   |
| C(7)-C(16)-C(17)-C(6)  | 13.2(10)  |
| C(15)-C(6)-C(17)-C(16) | -12.1(8)  |

---

Symmetry transformations used to generate equivalent atoms:
